# Supplementary material for: Comparison of CALGB 10403 (Alliance) and COG AALL0232 toxicity results in young adults with acute lymphoblastic leukemia
Source: Oxford University Press journal article supplement (doi:10.1182/bloodadvances.2020002439), 2021-01-22
Supplement: advancesadv2020002439-suppl1.pdf [file advancesadv2020002439-suppl1.pdf]

## Supplemental Figure 1 – CALGB10403 Schema<sup>5</sup>

### Remission Induction (Course I)

**Allopurinol** –300 mg/day (unless allergic) to continue until peripheral blasts and extramedullary disease are reduced

**IT-Ara-C** – Ara-C 70 mg IT on D 1.

**Pred** –60 mg/m<sup>2</sup>/day PO or IV in two divided doses on D1-28

**VCR** –1.5 mg/m<sup>2</sup> (max 2 mg) IV on D 1, 8, 15, and 22

**DNR** –25 mg/m<sup>2</sup> IV on D 1, 8, 15, and 22

**PEG** –2500 IU/m<sup>2</sup> IM or IV **D 4**

**IT-MTX** - 15 mg IT on D 8 & D 29 (also administered on D 15 and 22 for CNS3 patient)

### Extended Remission Induction (if required) (Course IA)

**Pred** –60 mg/m<sup>2</sup>/day PO or IV (methylprednisolone) in two divided doses on D 1-14

**DNR** –25 mg/m<sup>2</sup> IV on D 1

**VCR** – Vincristine 1.5 mg/m<sup>2</sup> (maximum 2 mg) IV on D 1 and 8

**PEG** –2500 IU/m<sup>2</sup> IM or IV D 4

### Remission Consolidation (Course II)

**CTX** –1000 mg/m<sup>2</sup> IV on D 1 & 29

**Ara-C** –75 mg/m<sup>2</sup> IV or SC on D 1-4, 8-11, 29-32, and 36-39

**6-MP** –60 mg/m<sup>2</sup> PO on D 1-14 and 29-42

**VCR** –1.5 mg/m<sup>2</sup> (maximum 2 mg) IV on D 15, 22, 43 and 50

**PEG** –2500 IU/m<sup>2</sup> IM or IV on D 15 and 43

**IT-MTX** - 15 mg IT on D 1, 8, 15 and 22 (omit does on D 15 &22 for CNS3 patients)

### Interim Maintenance (Course III)

**IV-MTX** –starting dose 100 mg/m<sup>2</sup> IV (escalate by 50 mg/m<sup>2</sup> /dose on D 1, 11, 21, 31 and 41

**PEG** –2500 IU/m<sup>2</sup> IM or IV on D.2 and 22

**IT-MTX** - 15 mg IT on D 1 and 31

### Delayed Intensification (Course IV)

**VCR** – 1.5 mg/m<sup>2</sup> (max 2 mg) IV on D 1, 8, 43, and 50

**DEX** – 10 mg/m<sup>2</sup> PO (or IV) divided BID on D 1-7 and 15-21

**PEG** –2500 IU/m<sup>2</sup> IM or IV D 4 (OR D 5 OR D 6) and D 43

**CTX** –1000 mg/m<sup>2</sup> IV on D 29

**Ara-C** –75 mg/m<sup>2</sup> IV or SC on D 29-32 and 36-39

**6-TG** –60 mg/m<sup>2</sup>/day PO on D 29-42

**IT-MTX** - 15 mg IT on D 1, 29, & 36

### Maintenance (Course V)\*

**VCR**—1.5 mg/m<sup>2</sup> (maximum dose 2 mg) IV on D 1, 29, and 57

**DEX**—6 mg/m<sup>2</sup>/day PO (or IV) divided BID every 4 weeks on D 1-5, 29-33, and 57-61

**6-MP**—75mg/m<sup>2</sup>/day PO on D 1-84

**IT-MTX** - 15 mg IT on D 1 (also is given on D 29 of the first 4 courses of maintenance )

**PO-MTX** —20 mg/m<sup>2</sup> PO weekly on D 8, 15, 22, 29, 36, 43, 50, 57, 64, 71, and 78 (held on D 29 of the first 4 courses of maintenance)

\*Maintenance therapy consists of 12 week courses and continues until 3 years from initiation of Interim Maintenance for males (2 years for females)

\*Patients with T-precursor ALL received 24 Gy prophylactic cranial irradiation during the first cycle of Maintenance therapy. Patients with CNS involvement at presentation received 18 Gy,

D: day, Pred: Prednisone, VCR: Vincristine, DNR: Daunorubicin, PEG: Peg-

Asparaginase, MTX: Methotrexate, CTX: Cyclophosphamide, Ara-C: Cytarabine, 6MP:

6-Mercaptopurine, 6-TG: Thioguanine, DEX: Dexamethasone
